# Supplementary material
Source: ML conference proceedings conference paper supplement (https://openaccess.thecvf.com/content/ICCV2021/html/Ettinger_Large_Scale_Interactive_ICCV_2021_paper.html)
Supplement: Supplementary file 2 [file Ettinger_Large_Scale_Interactive_ICCV_2021_supplemental.zip]

Archive with 7 entries (7 files):
- 9324-supp.pdf
- wod-motion-supp-1.mp4
- wod-motion-supp-2.mp4
- wod-motion-supp-3.mp4
- wod-motion-supp-4.mp4
- wod-motion-supp-fig_1a.mp4
- wod-motion-supp-fig_1b.mp4
